# Supplementary material for: Limited natural regeneration of unique Scalesia forest following invasive plant removal in Galapagos
Source: PLoS One. 2021 Oct 13;16(10):e0258467. doi: 10.1371/journal.pone.0258467 (PMC8513895; doi:10.1371/journal.pone.0258467)
Supplement: S1 Data — (CSV) [file pone.0258467.s005.csv]

sca_nr	height_Apr15	height_Jul15	height_Feb16	height_Aug16	height_Mar17	height_Jan18	height_Apr19	height_Mar20	state_Feb16	state_Aug16	state_Mar17	state_Jan18	state_Apr19	state_Apr20	shade_15	light_15	distance_15	15_surr_RubNiv	15_surr_TraFlu	15_soilandrocks	15_veg_total	15_canopy_CesAur	15_canopy_ScaPed
1	90	158	263	274	284	NA	NA		alive	alive	alive	T	T	T	72.4	27.6	320	0	90	0	100	1	0
2	73	104	NA	NA	NA	NA	NA		?	?	?	?	?	?	83.8	16.2	270	0	10	80	20	0	1
3	73	151	NA	NA	NA	NA	NA		?	?	?	?	?	?	61	39	50	0	30	40	60	0	1
4	49	97	NA	NA	NA	NA	NA		?	?	?	?	?	?	61.7	38.3	50	0	20	70	30	0	1
5	95	134	185	NA	NA	NA	NA		alive	T	T	T	T	T	60.2	39.8	200	0	0	60	40	0	1
6	80	108	NA	NA	NA	NA	NA		?	?	?	?	?	?	71.9	28.1	200	0	40	40	60	0	0
7	40	95	NA	NA	NA	NA	NA		?	?	T	T	T	T	53.9	46.1	220	0	0	90	10	0	1
8	75	136	222	340	378	455	419	500	alive	alive	alive	alive	alive	alive	38.6	61.4	240	0	10	80	20	0	1
9	60	NA	178	NA	NA	NA	NA		alive	?	?	?	?	?	89.6	10.4	410	10	10	80	20	0	1
10	70	114	151	214	258	307	NA		alive	alive	alive	alive	T	T	42.2	57.8	155	30	20	40	60	1	0
11	53	104	NA	NA	NA	NA	NA		?	?	?	?	?	?	90.3	9.7	96	0	100	0	100	0	1
12	88	147	NA	NA	461	570	574	580	alive	alive	alive	alive	alive	alive	20.6	79.4	280	0	100	0	100	0	0
13	100	NA	NA	NA	NA	NA	NA		?	?	?	?	?	?	22.3	77.7	240	20	70	0	100	0	1
14	91	151	228	NA	384	490	558		alive	?	alive	alive	alive	?	3.2	96.8	380	0	60	0	100	0	0
15	53	NA	NA	NA	NA	NA	NA		T	T	T	T	T	T	43.2	56.8	92	0	70	0	100	0	0
16	89	NA	NA	NA	NA	NA	NA		?	?	?	?	?	?	85.1	14.9	204	0	100	0	100	0	1
17	67	184	NA	NA	NA	NA	NA		?	?	?	?	?	?	5.6	94.4	390	0	0	90	10	0	0
18	53	149	208	244	NA	NA	NA		alive	alive	T	T	T	T	63.4	36.6	132	0	30	60	40	0	1
19	61	126	185	233	279	241	260	350	alive	alive	alive	alive	alive	alive	51.5	48.5	120	0	80	0	100	0	1
20	35	97	129	NA	NA	NA	NA		alive	T	T	T	T	T	37.8	62.2	149	0	0	100	0	0	0
21	87	158	223	241	248	NA	NA		alive	alive	alive	T	T	T	37.7	62.3	133	0	100	0	100	0	0
22	73	134	165	NA	NA	NA	NA		alive	T	T	T	T	T	42.1	57.9	253	0	50	50	50	0	0
23	55	118	141	NA	NA	NA	NA		alive	T	T	T	T	T	24	76	173	0	50	50	50	0	0
24	84	122	NA	NA	NA	NA	NA		?	?	?	?	?	?	52.7	47.3	322	10	0	80	20	0	0
25	34	117	291	463	566	650	700		alive	alive	alive	alive	alive	?	56.4	43.6	335	0	0	100	0	0	0
26	98	145	NA	NA	NA	NA	NA		?	?	?	?	?	?	54.7	45.3	244	0	70	0	100	1	0
27	99	140	NA	NA	NA	NA	NA		?	?	?	?	?	?	64.3	35.7	266	0	50	0	100	1	0
28	36	79	NA	NA	NA	NA	NA		?	?	T	T	T	T	49.2	50.8	180	0	0	100	0	0	1
29	74	84	NA	NA	NA	NA	NA		?	?	?	?	?	?	86.9	13.1	245	0	80	0	100	1	0
30	75	77	NA	NA	NA	NA	NA		?	?	?	?	?	?	76.2	23.8	204	20	0	50	50	0	1
31	69	81	NA	NA	NA	NA	NA		?	?	?	?	?	?	51.5	48.5	179	20	0	50	50	0	1
32	54	NA	109	136	129	NA	NA		alive	alive	alive	?	?	?	89.6	10.4	144	10	0	90	10	0	1
33	68	82	NA	NA	NA	NA	NA		?	?	?	T	T	T	88.5	11.5	133	30	0	60	40	0	1
34	91	115	NA	NA	NA	NA	NA		?	?	T	T	T	T	78.2	21.8	175	0	0	80	20	0	1
35	95	156	187	244	268	NA	NA		alive	alive	alive	T	T	T	58.8	41.2	107	30	0	60	40	0	1
36	50	NA	NA	NA	NA	NA	NA		?	?	T	T	T	T	42.6	57.4	114	30	0	70	30	0	1
37	83	NA	NA	NA	NA	NA	NA		T	T	T	T	T	T	86	14	137	0	0	90	10	0	1
38	63	NA	NA	NA	NA	NA	NA		T	T	T	T	T	T	80.3	19.7	183	0	0	100	0	0	1
39	54	NA	NA	NA	NA	NA	NA		?	?	T	T	T	T	90.5	9.5	316	0	0	60	40	0	1
40	98	151	NA	NA	NA	NA	NA		?	?	T	T	T	T	46.6	53.4	356	0	0	60	40	0	1
41	89	170	210	280	352	410	NA		alive	alive	alive	alive	T	T			164	30	0	10	90	0	1
42	61	NA	NA	NA	NA	NA	NA		T	T	T	T	T	T	84.1	15.9	130	0	0	70	30	0	1
43	73	48	NA	NA	NA	NA	NA		?	?	?	?	?	?	75.8	24.2	123	30	0	50	50	0	1
44	84	NA	NA	NA	NA	NA	NA		?	?	?	?	?	?	86.1	13.9	126	30	0	40	60	0	1
45	74	294	334	369	369	NA	NA		alive	alive	alive	T	T	T	83	17	118	50	0	20	80	0	1
46	62	NA	NA	NA	NA	NA	NA		T	T	T	T	T	T	49.3	50.7	59	0	0	80	20	0	1
47	18	NA	NA	NA	NA	NA	NA		T	T	T	T	T	T	92.3	7.7	173	0	0	60	40	0	1
48	53	NA	NA	NA	NA	NA	NA		T	T	T	T	T	T	92.6	7.4	250	0	0	70	30	0	1
49	93	NA	NA	NA	NA	NA	NA		T	T	T	T	T	T	89.2	10.8	213	0	0	30	70	0	1
50	70	NA	NA	NA	NA	NA	NA		T	T	T	T	T	T	92.1	7.9	215	0	0	40	60	0	1
51	91	NA	NA	NA	NA	NA	NA		T	T	T	T	T	T	88.1	11.9	206	0	0	70	30	0	1
52	33	86	107	NA	NA	NA	NA		alive	?	T	T	T	T	47.2	52.8	180	0	20	60	40	0	1
53	73	87	NA	NA	NA	NA	NA		?	?	T	T	T	T	83.4	16.6	139	0	0	40	60	0	1
54	49	NA	NA	NA	NA	NA	NA		T	T	T	T	T	T	88	12	116	0	0	100	0	0	1
55	44	NA	NA	NA	NA	NA	NA		T	T	T	T	T	T	85.7	14.3	111	0	0	100	0	0	1
56	98	123	174	256	342	443	480	490	alive	alive	alive	alive	alive	alive	86.7	13.3	259	0	100	0	100	0	1
57	60	72	NA	NA	NA	NA	NA		?	?	?	?	?	?	25.1	74.9	388	0	100	0	100	0	1
58	100	111	NA	NA	NA	NA	NA		?	?	?	?	?	?	61.6	38.4	204	10	60	0	100	0	1
59	59	103	NA	NA	NA	NA	NA		?	?	?	?	?	?	59.6	40.4	198	0	30	10	90	0	1
60	76	87	118	127	NA	NA	NA		alive	alive	T	T	T	T	51.4	48.6	215	0	100	0	100	0	1
61	70	101	NA	163	NA	232	NA		alive	alive	?	alive	?	?	57.4	42.6	102	0	80	0	100	1	1
62	99	NA	202	224	NA	NA	NA		alive	alive	?	?	?	?	82.8	17.2	86	0	10	50	50	0	1
63	45	NA	NA	NA	NA	NA	NA		T	T	T	T	T	T	74.2	25.8	81	0	20	60	40	0	1
64	36	NA	NA	NA	NA	NA	NA		?	?	?	?	?	?	30.9	69.1	233	0	10	80	20	0	1
65	10	135	NA	NA	NA	NA	NA		?	?	?	?	?	?	36.9	63.1	245	0	0	100	0	0	1
66	98	193	NA	NA	NA	NA	NA		?	?	?	?	?	?	49.4	50.6	136	50	0	50	50	0	1
67	85	152	NA	NA	278	364	423	440	alive	alive	alive	alive	alive	alive	49.5	50.5	141	60	0	40	60	0	1
68	79	103	NA	NA	NA	NA	NA		?	?	T	T	T	T	72.8	27.2	68	0	0	100	0	1	1
69	96	NA	NA	NA	NA	NA	NA		T	T	T	T	T	T	60.3	39.7	266	0	0	70	30	0	1
70	97	129	NA	155	171	NA	NA		alive	alive	alive	T	T	T	48.5	51.5	229	10	0	70	30	0	1
71	81	105	NA	NA	NA	NA	NA		?	?	?	?	?	?	48.9	51.1	234	0	0	60	40	0	1
72	67	105	NA	NA	NA	NA	NA		?	?	T	T	T	T	37.1	62.9	235	20	0	70	30	0	1
73	95	199	279	482	570	678	700	740	alive	alive	alive	alive	alive	alive	60.5	39.5	136	0	0	100	0	0	1
74	85	155	232	301	230	NA	NA		alive	alive	alive	T	T	T	60.7	39.3	128	0	20	50	50	0	1
75	95	133	NA	NA	NA	NA	NA		?	?	?	?	?	?	50.4	49.6	149	0	20	0	100	1	1
76	97	187	266	429	540	586	710	820	alive	alive	alive	alive	alive	alive	58.5	41.5	60	0	90	0	100	1	1
77	48	NA	NA	NA	NA	NA	NA		T	T	T	T	T	T	43.4	56.6	119	0	0	90	10	0	1
78	86	NA	NA	NA	NA	NA	NA		T	T	T	T	T	T	50.2	49.8	126	0	0	100	0	0	1
79	50	NA	NA	NA	NA	NA	NA		T	T	T	T	T	T	63	37	121	0	0	100	0	0	1
80	100	148	NA	271	363	352	NA		alive	alive	alive	alive	T	T	45.2	54.8	129	0	0	100	0	0	1
81	70	NA	NA	181	228	NA	NA		alive	alive	alive	T	T	T	65.3	34.7	106	0	0	100	0	1	1
82	38	NA	NA	NA	NA	NA	NA		T	T	T	T	T	T	68.9	31.1	141	0	20	80	20	0	1
83	64	171	245	262	288	NA	NA		alive	alive	alive	T	T	T	55.4	44.6	335	10	90	0	100	0	1
84	99	178	291	448	410	430	275	340	alive	alive	alive	alive	alive	alive	37.8	62.2	651	0	90	0	100	1	0
85	73	173	207	240	NA	NA	NA		alive	alive	T	T	T	T	41.5	58.5	316	20	80	0	100	0	1
86	20	70	NA	NA	NA	NA	NA		T	T	T	T	T	T	27.5	72.5	332	10	0	90	10	0	1
87	23	63	NA	NA	NA	NA	NA		T	T	T	T	T	T	41.6	58.4	315	0	10	80	20	1	1
88	25	NA	NA	NA	NA	NA	NA		T	T	T	T	T	T	79.3	20.7	283	0	10	90	10	0	1
89	49	177	315	388	419	450	480		alive	alive	alive	alive	alive	?	45	55	274	0	50	40	60	0	1
90	45	144	NA	NA	NA	NA	NA		T	T	T	T	T	T	50	50	272	0	40	60	40	0	1
91	47	152	184	NA	NA	NA	NA		alive	T	T	T	T	T	52.8	47.2	257	0	80	20	80	0	1
92	50	92	NA	NA	NA	NA	NA		T	T	T	T	T	T	53.4	46.6	242	0	100	0	100	0	1
93	41	NA	NA	NA	NA	NA	NA		T	T	T	T	T	T	46.1	53.9	256	0	60	40	60	0	1
94	67	149	NA	NA	NA	NA	NA		T	T	T	T	T	T	52.9	47.1	229	0	100	0	100	0	1
95	60	122	NA	NA	NA	NA	NA		T	T	T	T	T	T	48.9	51.1	238	0	90	10	90	0	1
96	83	235	328	400	435	432	NA		alive	alive	alive	alive	T	T	47.7	52.3	218	0	10	90	10	0	1
97	40	NA	NA	NA	NA	NA	NA		T	T	T	T	T	T	51.4	48.6	196	0	100	0	100	0	1
98	76	198	228	246	248	NA	NA		alive	alive	alive	T	T	T	52.2	47.8	185	0	90	0	100	0	1
99	45	NA	NA	NA	NA	NA	NA		T	T	T	T	T	T	63	37	243	0	60	40	60	0	1
100	10	NA	NA	NA	NA	NA	NA		T	T	T	T	T	T	88.3	11.7	209	0	0	100	0	0	1
101	77	163	180	NA	NA	NA	NA		alive	T	T	T	T	T	52	48	225	0	80	0	100	0	1
102	23	NA	NA	NA	NA	NA	NA		?	?	?	?	?	?	86.9	13.1	120	0	0	80	20	1	1
103	98	146	156	200	NA	NA	NA		alive	alive	T	T	T	T	17.5	82.5	394	10	0	60	40	0	1
104	90	87	105	NA	NA	NA	NA		alive	T	T	T	T	T	57.6	42.4	131	0	10	60	40	0	1
108	89	108	NA	215	215	NA	NA		alive	alive	alive	T	T	T	48.6	51.4	300	10	0	70	30	0	1
109	88	103	NA	NA	NA	NA	NA		?	?	T	T	T	T	52.3	47.7	313	0	0	90	10	0	1
110	95	120	NA	176	176	NA	NA		alive	alive	alive	T	T	T	56.3	43.7	305	40	0	50	50	0	1
111	56	80	NA	NA	NA	NA	NA		?	?	T	T	T	T	60.6	39.4	280	0	0	100	0	0	1
112	64	112	NA	173	272	328	NA		alive	alive	alive	alive	?	?	50	50	320	0	0	90	10	0	1
113	48	76	NA	222	180	NA	NA		alive	alive	alive	T	T	T	56.7	43.3	316	0	0	90	10	0	1
114	76	104	NA	NA	NA	NA	NA		?	?	?	T	T	T	51.3	48.7	330	0	0	90	10	0	1
115	54	96	NA	173	197	NA	NA		alive	alive	alive	T	T	T	56	44	340	0	0	80	20	0	1
116	48	NA	NA	NA	NA	NA	NA		T	T	T	T	T	T	51	49	333	0	0	90	10	0	1
117	50	64	NA	NA	NA	NA	NA		?	?	T	T	T	T	53.4	46.6	332	0	0	50	50	0	1
118	38	NA	NA	NA	NA	NA	NA		T	T	T	T	T	T	61.9	38.1	356	0	0	80	20	0	1
119	45	62	NA	NA	NA	NA	NA		?	?	T	T	T	T	63.5	36.5	325	0	0	90	10	0	1
120	11	NA	NA	NA	NA	NA	NA		T	T	T	T	T	T	58.8	41.2	265	0	0	90	10	0	1
121	27	62	NA	NA	NA	NA	NA		?	?	T	T	T	T	58.1	41.9	265	0	0	60	40	0	1
122	95	NA	NA	NA	NA	NA	NA		T	T	T	T	T	T	56.9	43.1	206	0	100	0	100	1	0
123	87	247	400	518	598	645	810	820	alive	alive	alive	alive	alive	alive	26.4	73.6	318	10	0	90	10	0	1
124	81	145	192	NA	NA	NA	NA		alive	T	T	T	T	T	27.6	72.4	289	0	0	100	0	0	1
125	100	155	277	341	356	NA	NA		alive	alive	alive	T	T	T	22.1	77.9	80	0	40	60	40	0	1
126	77	99	102	110	NA	NA	NA		alive	alive	T	T	T	T	66.3	33.7	148	0	100	0	100	0	1
127	47	NA	NA	NA	NA	NA	NA		T	T	T	T	T	T	70.5	29.5	357	0	90	0	100	0	0
128	65	NA	NA	NA	249	321	370		alive	alive	alive	alive	alive	T	60.5	39.5	136	0	0	0	100	1	1
129	84	176	246	NA	NA	NA	NA		alive	T	T	T	T	T	43.4	56.6	268	0	0	50	50	1	0
130	66	72	120	NA	NA	NA	NA		alive	T	T	T	T	T	92	8	184	0	0	60	40	1	0
131	47	69	NA	NA	NA	NA	NA		T	T	T	T	T	T	91.3	8.7	199	0	0	80	20	1	0
132	47	79	140	NA	NA	NA	NA		alive	T	T	T	T	T	86.7	13.3	213	0	0	40	60	1	0
133	29	75	162	NA	NA	NA	NA		alive	T	T	T	T	T			212	0	0	60	40	1	1
134	70	98	NA	NA	NA	NA	NA		?	?	?	?	?	?	56.6	43.4	303	0	0	90	10	1	0
135	34	87	170	194	200	NA	NA		alive	alive	alive	T	T	T	58.2	41.8	276	0	0	70	30	1	0
137	64	123	221	245	267	330	NA		alive	alive	alive	alive	T	T	50	50	233	0	0	100	0	0	1
138	100	137	NA	NA	NA	NA	NA		?	?	?	?	?	?	45.1	54.9	277	0	0	100	0	0	1
139	79	NA	NA	NA	NA	330	NA		T	T	T	alive	?	?	45.1	54.9	189	0	0	100	0	0	1
140	74	124	NA	NA	NA	NA	NA		?	?	?	?	?	?	61.1	38.9	57	20	0	80	20	0	1
141	62	142	269	384	447	465	468		alive	alive	alive	alive	alive	T	67.4	32.6	251	0	0	70	30	0	1
142	20	NA	NA	NA	NA	NA	NA		T	T	T	T	T	T	79.5	20.5	208	0	0	100	0	0	1
143	18	NA	NA	NA	367	486	535	420	alive	alive	alive	alive	alive	alive	50	50	272	0	0	70	30	0	1
144	63	NA	NA	100	NA	NA	NA		alive	alive	T	T	T	T			331	20	0	60	40	0	1
145	73	NA	NA	NA	364	431	NA		alive	alive	alive	alive	?	?	3	97	516	10	80	0	100	0	1
146	82	NA	NA	NA	NA	NA	NA		?	?	?	?	?	?	83.3	16.7	657	0	100	0	100	0	1
147	53	NA	NA	NA	NA	NA	NA		?	?	?	?	?	?	25	75	561	30	30	40	60	0	1
148	74	NA	NA	NA	NA	NA	NA		?	?	?	?	?	?	66.7	33.3	619	0	100	0	100	0	1
149	54	NA	NA	NA	NA	NA	NA		?	?	?	?	?	?	26	74	351	0	0	70	30	0	1
150	76	192	202	302	335	NA	NA		alive	alive	alive	T	T	T	80.1	19.9	179	0	0	0	100	0	1
151	20	NA	NA	NA	NA	NA	NA		?	?	?	?	?	?	46.6	53.4	315	0	0	80	20	0	1
152	70	127	185	330	374	479	530		alive	alive	alive	alive	alive	T	61.7	38.3	91	0	100	0	100	0	1
153	27	NA	NA	NA	NA	NA	NA		?	?	?	?	?	?			182	0	0	0	100	0	1
154	85	NA	NA	NA	NA	NA	NA		T	T	T	T	T	T	41.4	58.6	245	10	0	60	40	0	1
155	72	NA	NA	NA	NA	NA	NA		T	T	T	T	T	T	70.7	29.3	299	0	0	0	100	0	1
156	75	NA	NA	NA	631	739	696		alive	alive	alive	alive	alive	?	33.2	66.8	355	10	0	10	90	0	1
157	86	NA	NA	NA	NA	NA	NA		T	T	T	T	T	T	72.9	27.1	59	0	0	50	50	0	1
158	44	77	NA	NA	NA	NA	NA		T	T	T	T	T	T	70.8	29.2	130	10	0	50	50	0	1
159	91	NA	NA	NA	NA	NA	NA		T	T	T	T	T	T	70.9	29.1	89	0	0	60	40	0	1
160	69	79	NA	NA	NA	NA	NA		T	T	T	T	T	T	69.5	30.5	89	0	0	40	60	0	1
161	59	NA	NA	NA	NA	NA	NA		T	T	T	T	T	T	72	28	82	0	0	50	50	0	1
162	52	NA	NA	NA	NA	NA	NA		T	T	T	T	T	T	74.8	25.2	87	0	0	30	70	0	1
163	71	NA	NA	NA	NA	NA	NA		T	T	T	T	T	T	77.5	22.5	76	0	0	50	50	1	1
164	55	NA	NA	NA	NA	NA	NA		T	T	T	T	T	T	74.2	25.8	44	0	0	60	40	1	1
165	76	90	NA	NA	NA	NA	NA		T	T	T	T	T	T	69.1	30.9	75	0	0	50	50	0	1
166	70	NA	NA	NA	NA	NA	NA		T	T	T	T	T	T	70.3	29.7	106	0	0	70	30	0	1
167	68	83	NA	NA	NA	NA	NA		T	T	T	T	T	T	75.2	24.8	131	0	0	20	80	0	1
168	43	NA	NA	NA	NA	NA	NA		T	T	T	T	T	T	88	12	143	0	0	70	30	0	1
169	74	NA	NA	NA	NA	NA	NA		T	T	T	T	T	T	82.2	17.8	16	0	0	60	40	0	1
170	70	88	NA	NA	NA	NA	NA		?	?	?	?	?	?	82	18	22	0	0	30	70	0	1
171	61	NA	NA	NA	NA	NA	NA		T	T	T	T	T	T	65.8	34.2	59	0	0	40	60	0	1
172	78	128	NA	NA	NA	NA	NA		?	?	?	?	?	?	50.8	49.2	110	0	0	30	70	0	1
173	30	72	121	152	168	NA	NA		alive	alive	alive	?	?	?	86.5	13.5	91	0	0	90	10	1	1
174	40	112	NA	NA	NA	NA	NA		T	T	T	T	T	T	68.4	31.6	188	0	0	90	10	0	1
175	29	73	NA	NA	NA	NA	NA		T	T	T	T	T	T	83.2	16.8	105	0	0	100	0	0	1
176	30	31	NA	NA	NA	NA	NA		T	T	T	T	T	T	83.3	16.7	106	0	0	100	0	0	1
177	89	155	236	304	351	409	477	500	alive	alive	alive	alive	alive	alive	81.3	18.7	107	0	0	100	0	0	1
178	72	102	NA	NA	NA	NA	NA		?	?	?	?	?	?	82.8	17.2	150	0	0	80	20	0	1
179	37	61	NA	NA	NA	NA	NA		T	T	T	T	T	T	82.3	17.7	152	0	0	100	0	0	1
180	91	135	NA	NA	NA	NA	NA		?	?	?	?	?	?	80	20	167	0	0	100	0	0	1
181	40	53	NA	NA	NA	NA	NA		?	?	?	T	T	T	87.6	12.4	143	0	0	80	20	0	1
182	64	NA	NA	NA	NA	NA	NA		T	T	T	T	T	T	86.1	13.9	92	0	0	60	40	0	1
183	96	119	146	171	170	NA	NA		alive	alive	alive	T	T	T	84.9	15.1	122	0	0	80	20	0	1
184	94	130	171	181	189	NA	NA		alive	alive	alive	T	T	T	83.1	16.9	171	20	0	80	20	0	1
185	81	NA	NA	NA	NA	NA	NA		T	T	T	T	T	T	76.8	23.2	179	0	0	60	40	0	1
186	64	NA	NA	NA	NA	NA	NA		T	T	T	T	T	T	80.1	19.9	157	0	0	60	40	0	1
187	74	94	156	NA	NA	NA	NA		alive	T	T	T	T	T	81.5	18.5	85	0	0	20	80	0	1
188	90	141	253	492	514	NA	NA		alive	alive	alive	T	T	T	85.6	14.4	221	0	10	30	70	1	1
189	12	NA	166	NA	264	292	NA		alive	alive	alive	alive	T	T	71.9	28.1	185	0	0	100	0	0	1
190	16	NA	NA	NA	NA	NA	NA		T	T	T	T	T	T	74.6	25.4	261	0	0	100	0	0	1
191	96	176	NA	NA	372	NA	NA		alive	alive	alive	T	T	T	23.1	76.9	236	0	0	60	40	0	1
192	99	124	149	150	NA	NA	NA		alive	alive	?	?	?	?	85.7	14.3	109	0	80	0	100	1	1
193	98	119	NA	NA	NA	NA	NA		T	T	T	T	T	T	86.3	13.7	145	0	80	0	100	1	1
194	100	NA	NA	NA	NA	NA	NA		T	T	T	T	T	T	83.9	16.1	182	0	20	0	100	1	1
195	82	96	NA	NA	NA	NA	NA		T	T	T	T	T	T	74.5	25.5	145	0	0	40	60	1	1
196	98	127	NA	NA	NA	NA	NA		T	T	T	T	T	T	71	29	151	0	0	20	80	1	1
197	80	NA	NA	NA	NA	NA	NA		T	T	T	T	T	T	78.1	21.9	170	0	0	100	0	1	1
198	86	97	NA	NA	NA	NA	NA		T	T	T	T	T	T	80.5	19.5	176	0	0	90	10	1	1
199	69	NA	NA	NA	NA	NA	NA		T	T	T	T	T	T	91.3	8.7	163	0	0	0	100	1	1
200	43	NA	NA	NA	NA	NA	NA		T	T	T	T	T	T	89.1	10.9	177	0	0	60	40	1	1
201	79	90	NA	NA	NA	NA	NA		T	T	T	T	T	T	83.6	16.4	182	0	0	60	40	1	1
202	70	NA	NA	NA	NA	NA	NA		T	T	T	T	T	T	80.7	19.3	184	0	0	40	60	1	1
203	65	NA	NA	NA	NA	NA	NA		T	T	T	T	T	T	83.2	16.8	124	0	0	40	60	1	1
204	59	NA	NA	NA	NA	NA	NA		T	T	T	T	T	T	80.9	19.1	118	0	0	70	30	1	1
205	60	71	NA	NA	NA	NA	NA		T	T	T	T	T	T	76.1	23.9	153	0	0	50	50	1	1
206	50	NA	NA	NA	NA	NA	NA		T	T	T	T	T	T	80.9	19.1	116	0	0	20	80	1	1
207	62	74	NA	NA	NA	NA	NA		T	T	T	T	T	T	82	18	176	0	0	80	20	1	1
208	57	NA	NA	NA	NA	NA	NA		T	T	T	T	T	T	66.9	33.1	74	0	0	60	40	1	1
209	47	NA	NA	NA	NA	NA	NA		T	T	T	T	T	T	59.8	40.2	68	0	0	40	60	1	1
210	44	70	NA	NA	NA	NA	NA		T	T	T	T	T	T	69.5	30.5	76	0	20	50	50	1	1
211	54	80	NA	NA	NA	NA	NA		?	?	?	?	?	?	67.1	32.9	81	0	0	70	30	1	1
212	47	61	NA	NA	NA	NA	NA		T	T	T	T	T	T	71.6	28.4	110	0	0	60	40	1	1
213	48	74	NA	NA	NA	NA	NA		T	T	T	T	T	T	70	30	223	0	0	90	10	1	1
214	44	NA	NA	NA	NA	NA	NA		T	T	T	T	T	T	65.7	34.3	131	0	0	80	20	1	1
215	53	NA	NA	NA	NA	NA	NA		T	T	T	T	T	T	68.3	31.7	148	0	0	70	30	1	1
216	56	NA	NA	NA	NA	NA	NA		T	T	T	T	T	T	74.4	25.6	136	0	0	80	20	1	1
217	62	74	144	224	262	279	337	360	alive	alive	alive	alive	alive	alive	72.1	27.9	140	0	0	NA	NA	1	1
218	65	NA	NA	NA	NA	NA	NA		T	T	T	T	T	T	71.1	28.9	136	0	0	20	80	1	1
219	60	NA	NA	NA	NA	NA	NA		T	T	T	T	T	T	69.4	30.6	149	0	0	40	60	1	1
220	65	NA	NA	NA	NA	NA	NA		T	T	T	T	T	T	73.6	26.4	156	0	0	60	40	1	1
221	34	NA	NA	NA	NA	NA	NA		T	T	T	T	T	T	80.9	19.1	144	0	0	60	40	1	1
222	60	76	141	160	NA	NA	NA		alive	alive	T	T	T	T	63.9	36.1	95	0	40	60	40	1	1
223	36	NA	NA	NA	NA	NA	NA		T	T	T	T	T	T	63.7	36.3	95	0	0	70	30	1	1
224	52	NA	NA	NA	NA	NA	NA		T	T	T	T	T	T	67.8	32.2	65	0	0	50	50	1	1
225	52	71	NA	NA	NA	NA	NA		T	T	T	T	T	T	69.9	30.1	26	0	0	60	40	1	1
226	66	77	NA	NA	NA	NA	NA		T	T	T	T	T	T	74.7	25.3	115	0	0	50	50	1	1
227	55	94	132	NA	NA	NA	NA		alive	T	T	T	T	T	73.2	26.8	184	0	0	70	30	1	1
228	34	NA	NA	NA	NA	NA	NA		T	T	T	T	T	T	78.1	21.9	174	0	0	60	40	1	1
229	21	NA	NA	NA	NA	NA	NA		T	T	T	T	T	T	69.8	30.2	180	0	0	60	40	1	1
230	29	NA	NA	NA	NA	NA	NA		T	T	T	T	T	T	72.3	27.7	197	0	0	70	30	1	1
231	38	NA	NA	NA	NA	NA	NA		T	T	T	T	T	T	74.6	25.4	170	0	0	90	10	1	1
232	49	74	NA	NA	NA	NA	NA		T	T	T	T	T	T	74	26	161	0	0	40	60	1	1
233	29	NA	NA	NA	NA	NA	NA		T	T	T	T	T	T	70.4	29.6	181	0	0	100	0	1	1
234	40	NA	NA	NA	NA	NA	NA		T	T	T	T	T	T	71.4	28.6	214	0	0	100	0	1	1
235	39	NA	NA	NA	NA	NA	NA		T	T	T	T	T	T	73.2	26.8	203	0	0	50	50	1	1
236	43	65	NA	NA	NA	NA	NA		T	T	T	T	T	T	75.9	24.1	178	0	0	80	20	1	1
237	40	NA	NA	NA	NA	NA	NA		T	T	T	T	T	T	77.3	22.7	94	0	0	70	30	1	1
238	42	NA	NA	NA	NA	NA	NA		T	T	T	T	T	T	74.3	25.7	80	0	0	30	70	1	1
239	31	NA	NA	NA	NA	NA	NA		T	T	T	T	T	T	74.6	25.4	103	0	0	60	40	1	1
240	53	NA	NA	NA	NA	NA	NA		T	T	T	T	T	T	74.6	25.4	79	10	0	60	40	1	1
241	30	NA	NA	NA	NA	NA	NA		T	T	T	T	T	T	76.1	23.9	44	0	0	80	20	1	1
242	34	NA	NA	NA	NA	NA	NA		T	T	T	T	T	T	76.8	23.2	57	0	0	40	60	1	1
243	51	66	107	NA	NA	NA	NA		alive	T	T	T	T	T	67.4	32.6	37	0	0	70	30	1	1
244	36	NA	NA	NA	NA	NA	NA		T	T	T	T	T	T	63.4	36.6	83	0	0	40	60	1	1
245	30	NA	NA	NA	NA	NA	NA		T	T	T	T	T	T	68.8	31.2	202	0	0	70	30	1	1
246	38	NA	NA	NA	NA	NA	NA		T	T	T	T	T	T	78.5	21.5	87	0	0	50	50	1	1
247	24	NA	NA	NA	NA	NA	NA		T	T	T	T	T	T	72	28	84	20	0	50	50	1	1
248	73	NA	189	321	375	309	329		alive	alive	alive	alive	alive	?	72.7	27.3	115	0	0	40	60	1	1
249	43	NA	NA	NA	NA	NA	NA		T	T	T	T	T	T	80	20	51	0	0	80	20	1	1
250	73	85	NA	NA	NA	NA	NA		T	T	T	T	T	T	76	24	70	0	20	50	50	1	1
251	69	94	101	NA	NA	NA	NA		alive	T	T	T	T	T	77.9	22.1	115	0	0	40	60	1	1
252	57	NA	NA	NA	NA	NA	NA		T	T	T	T	T	T	75.6	24.4	93	0	20	10	90	1	1
253	39	NA	NA	NA	NA	NA	NA		T	T	T	T	T	T	79.1	20.9	100	0	0	70	30	1	1
254	60	74	NA	NA	NA	NA	NA		T	T	T	T	T	T	71.7	28.3	158	0	0	40	60	1	1
255	60	97	153	223	272	NA	NA		alive	alive	alive	?	?	?	73.4	26.6	194	0	0	30	70	1	1
256	52	NA	NA	NA	NA	NA	NA		T	T	T	T	T	T	74.7	25.3	262	0	0	0	100	1	1
257	66	102	161	189	202	NA	NA		alive	alive	alive	?	?	?	79.2	20.8	267	0	0	50	50	1	1
258	57	95	128	140	NA	NA	NA		alive	alive	T	T	T	T	80.6	19.4	276	0	0	40	60	1	1
259	47	NA	NA	NA	NA	NA	NA		T	T	T	T	T	T	82.7	17.3	287	0	0	20	80	1	1
260	20	72	NA	NA	NA	NA	NA		T	T	T	T	T	T	74.6	25.4	350	0	0	80	20	1	1
261	34	NA	NA	NA	NA	NA	NA		T	T	T	T	T	T	80.5	19.5	208	0	0	50	50	1	1
262	60	NA	296	359	376	333	NA		alive	alive	alive	alive	T	T	46.5	53.5	173	30	0	50	50	0	1
263	97	234	440	512	514	525	576	640	alive	alive	alive	alive	alive	alive	7.5	92.5	253	0	100	0	100	0	0
